# Supplementary material for: Antitumour Effects of Astaxanthin and Adonixanthin on Glioblastoma
Source: PubMed Central journal article supplement (PMC7551886; doi:10.3390/md18090474), 2020-09-18
Supplement: marinedrugs-18-00474-s001.pdf [file marinedrugs-18-00474-s001.pdf]

**Supplemental table 1. Astaxanthin or adonixanthin levels in the mouse tissues without brain**

| Tissues | Astaxanthin    |               | Adonixanthin       |                |
|---------|----------------|---------------|--------------------|----------------|
|         | <i>trans</i>   | <i>cis</i>    | <i>trans</i>       | <i>cis</i>     |
| Heart   | 57.81 ± 11.61  | 66.71 ± 30.75 | 134.55 ± 33.00*    | 6.37 ± 5.71    |
| Lung    | 64.26 ± 29.75  | 41.91 ± 36.72 | 1841.33 ± 1181.79* | 103.03 ± 66.09 |
| Spleen  | 74.16 ± 20.83* | 13.62 ± 2.47  | 255.03 ± 45.17*    | 22.13 ± 3.47   |
| Kidney  | 59.90 ± 27.80  | 24.73 ± 14.34 | 734.62 ± 111.01*   | 38.99 ± 6.12   |
| Liver   | 95.00 ± 22.13* | 13.57 ± 6.08  | 1817.92 ± 738.28*  | 108.52 ± 42.28 |

Data are shown as mean ± SEM (n = 4). ng/g. \* $p < 0.05$ , \*\* $p < 0.01$  vs. *cis*-form group (Mann-Whitney *U*-test ).

# Supplemental Figure 1

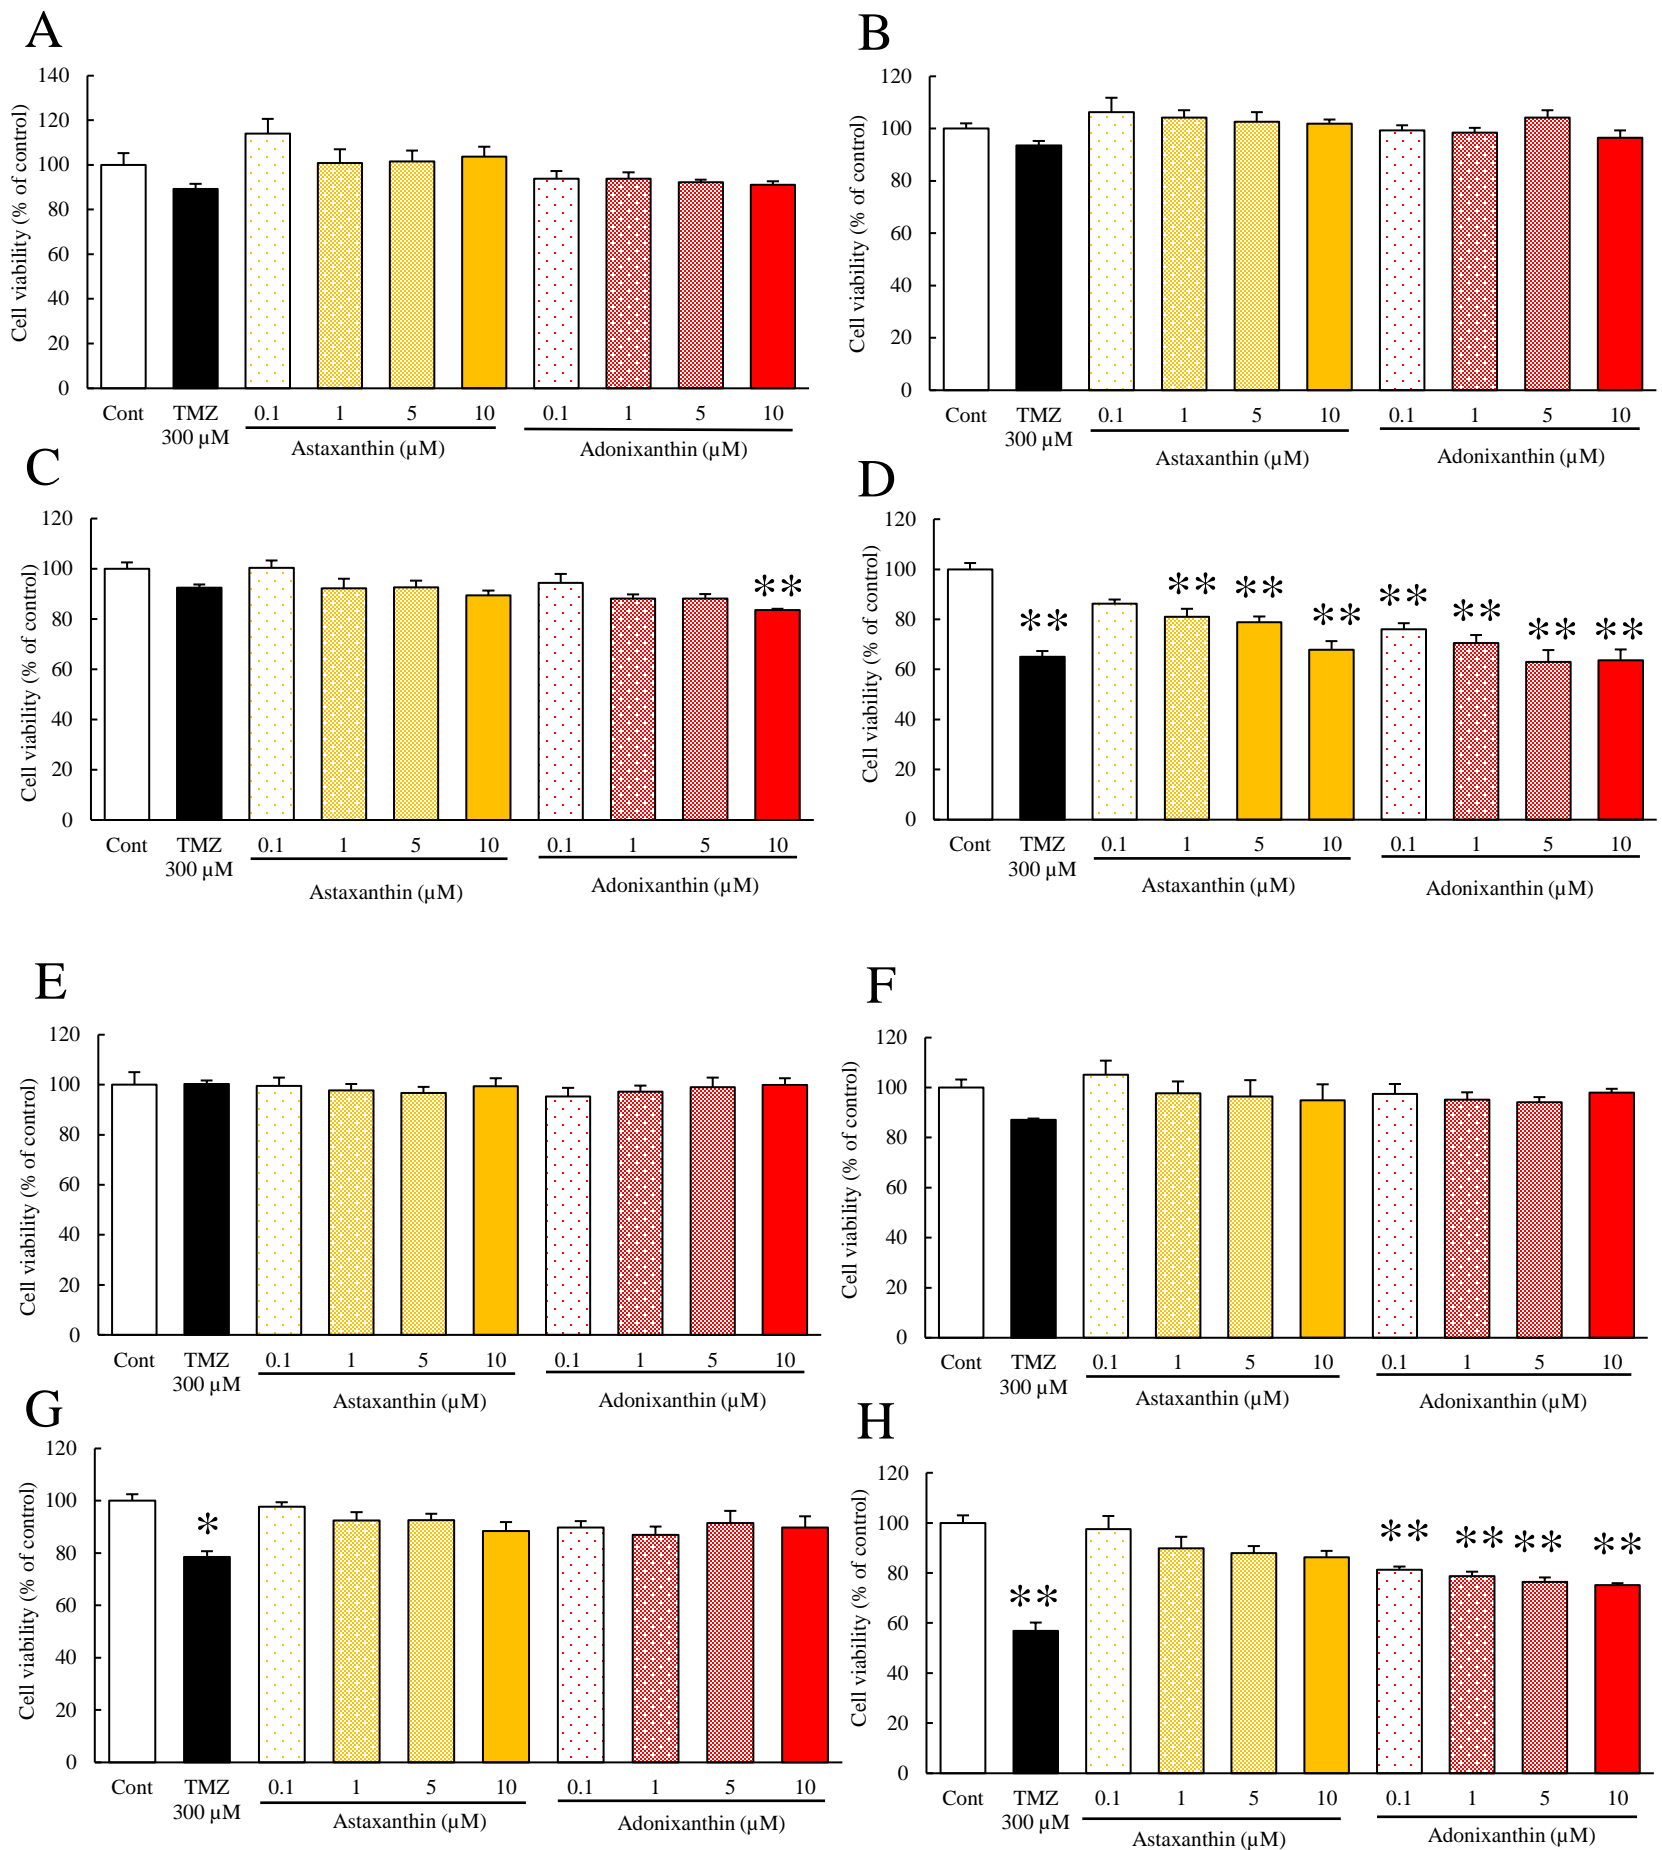

**Supplemental figure 1. Cell viability of mouse and human glioblastoma cell line with astaxanthin and adonixanthin.**

(A-H) These graphs show the cell viability of GL261 (mouse glioblastoma cell line) and U251MG (human glioblastoma cell line) treated 6 h (A, E), 24 h (B, F), 48 h (C, G), 72 h (D, H) with temozolomide, astaxanthin or adonixanthin.

Data are shown as mean  $\pm$  SEM (n = 6). \* $p$  < 0.05, \*\* $p$  < 0.01 vs. control group (Tukey's test). TMZ; temozolomide.

A

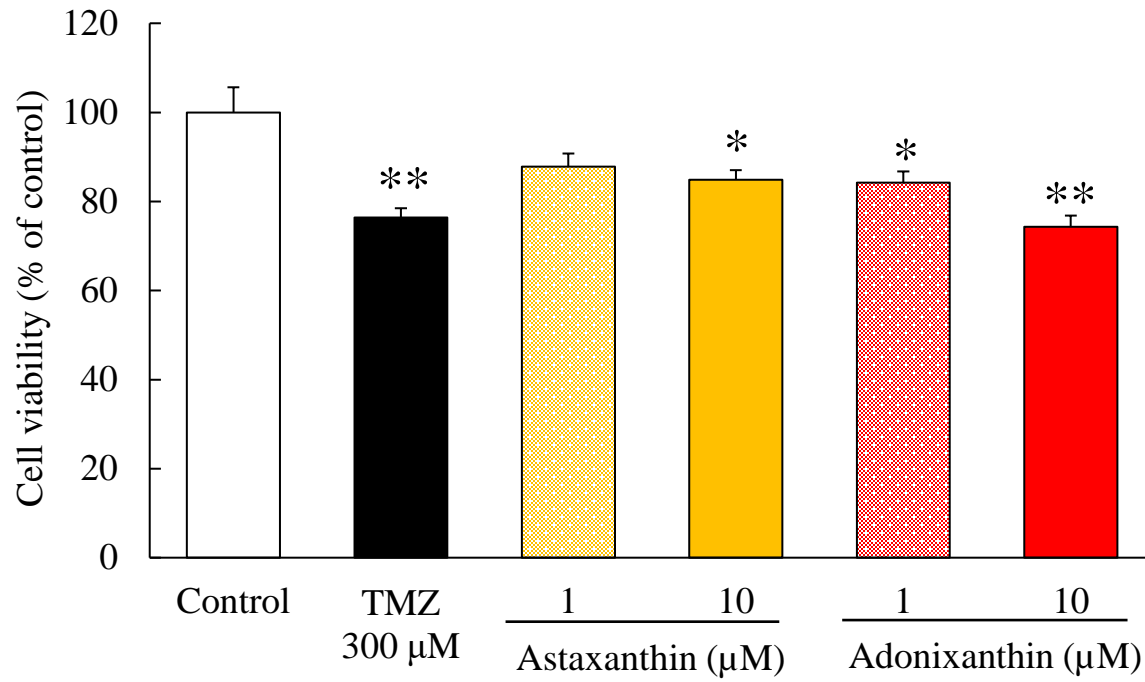

**Supplemental figure 2. Cell viability of human glioblastoma cell line U87MG with astaxanthin and adonixanthin.**

This graph show the cell viability of human glioblastoma cell line U87MG treated 96 h with temozolomide, astaxanthin or adonixanthin. Data are shown as mean  $\pm$  SEM (n = 6). \* $p$  < 0.05, \*\* $p$  < 0.01 vs. control group (Tukey's test). TMZ; temozolomide.

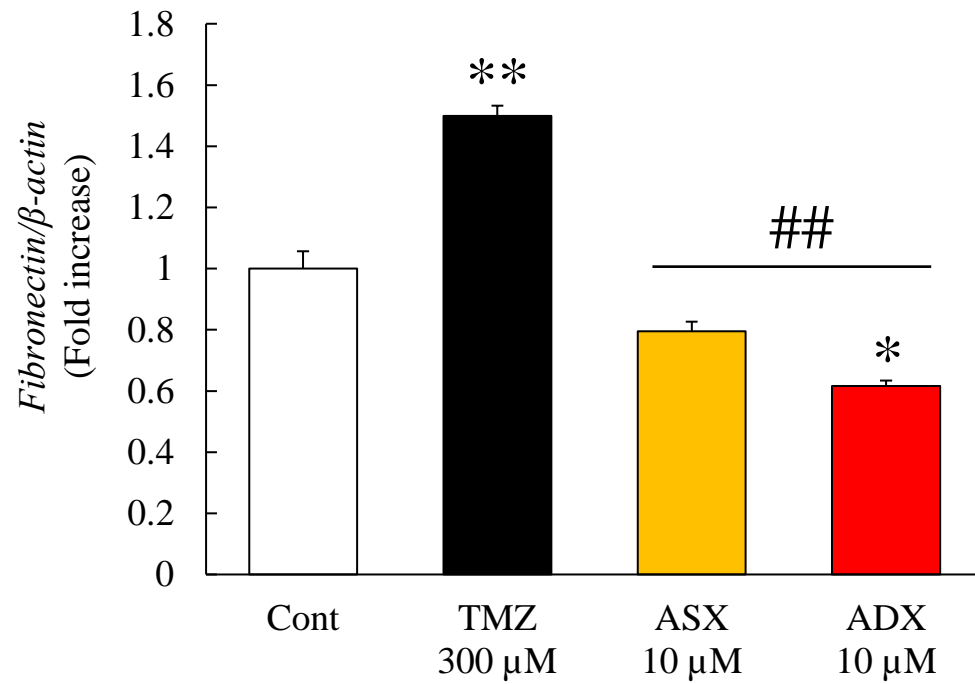

**Supplemental figure 3. Expression of Fibronectin mRNA after 48h treatment of astaxanthin and adonixanthin in mouse glioblastoma cell line.**

The quantitative data of fibronectin mRNA level in mouse glioblastoma cell line GL261 at 48 h after treatment of 300  $\mu$ M temozolomide, 10  $\mu$ M astaxanthin or 10  $\mu$ M adonixanthin. Data are shown as mean  $\pm$  SEM (n = 6). \* $p$  < 0.05, \*\* $p$  < 0.01 vs. control group (Student's  $t$ -test), ## $p$  < 0.01 vs. astaxanthin group (Student's  $t$ -test), TMZ; temozolomide. ASX; astaxanthin. ADX; adonixanthin.

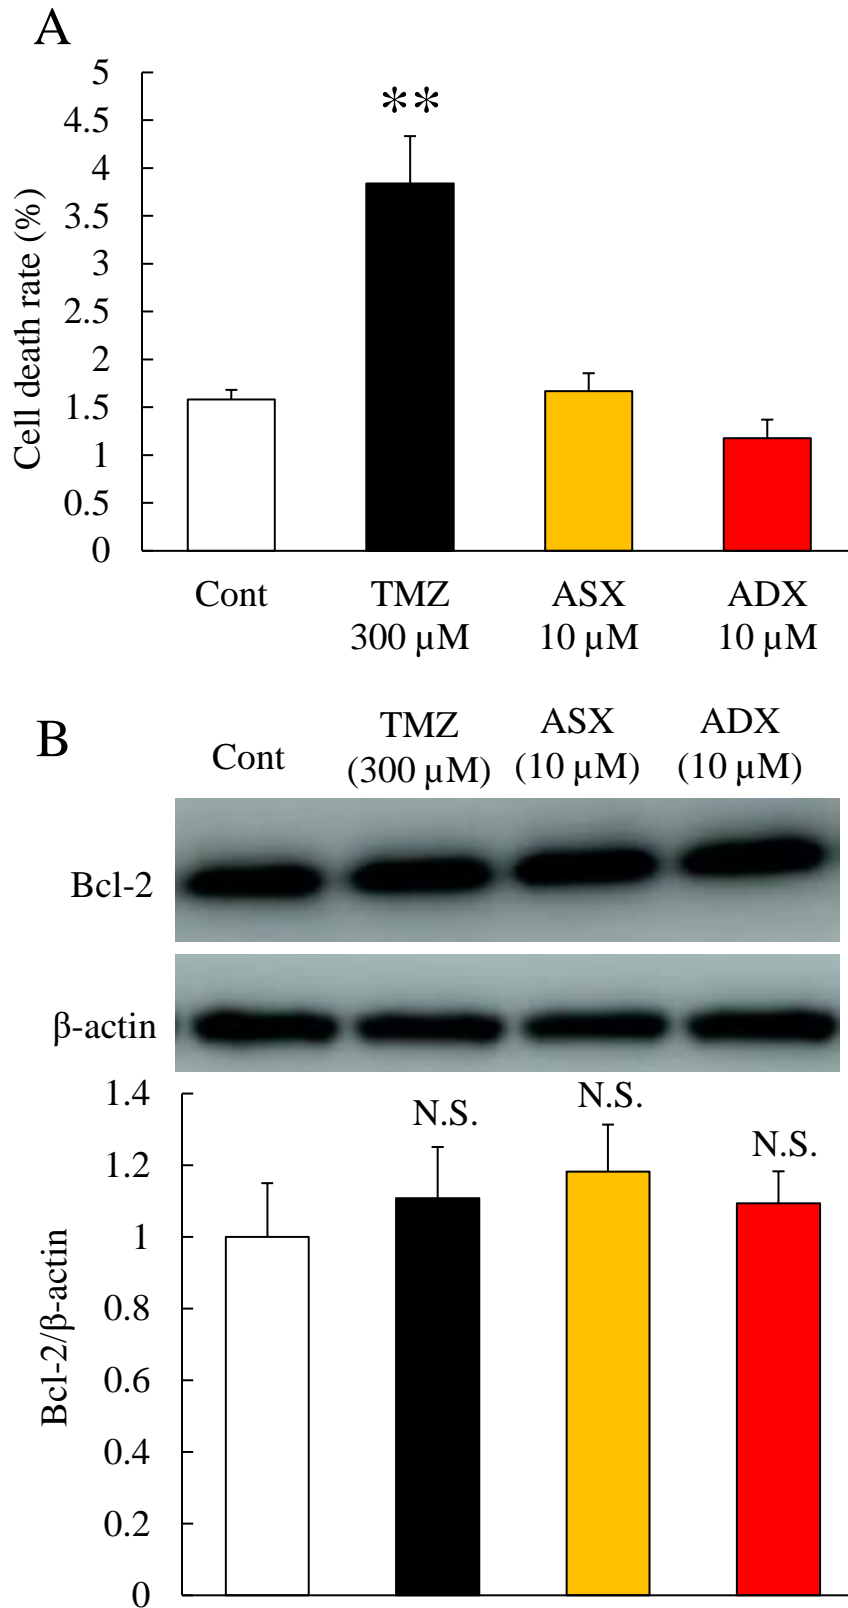

**Supplemental figure 4 . The effect of astaxanthin and adonixanthin for cell death**

(A) Cell death assay after 72h treatment of astaxanthin, adonixanthin and temozolomide. Data are shown as mean  $\pm$  SEM (n = 6). \*\* $p$  < 0.01 vs. control group (Student's  $t$ -test).

(B) Expression of Bcl-2 after 48h treatment of astaxanthin and adonixanthin in mouse glioblastoma cell line.

Data are shown as mean  $\pm$  SEM (n = 4). N.S. ; not significant (Student's  $t$ -test). TMZ; temozolomide.

ASX; astaxanthin. ADX; adonixanthin.

# Supplemental Figure 5

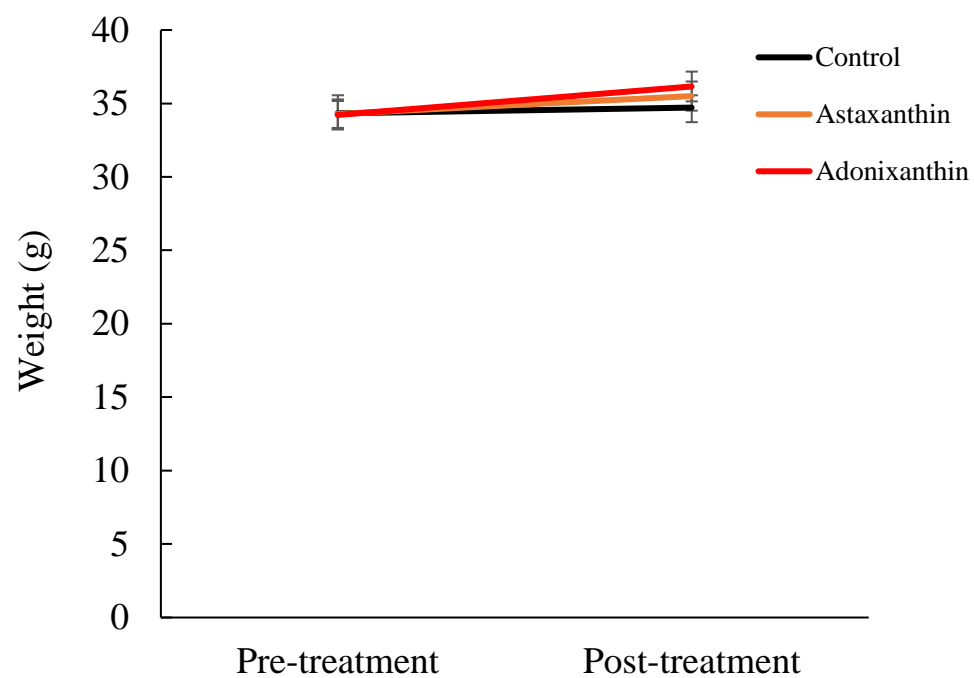

**Supplemental figure 5. The effects of astaxanthin and adonixanthin on body weight.**

This graph show the weight of mice at pre- or post-treated with astaxanthin or adonixanthin.

Data are shown as mean  $\pm$  SEM (n = 4).
